# Supplementary material for: Development of the HEMOS (Hemorrhoid Operative Selection) Score: A Clinical Tool to Support Operative Consideration in Hemorrhoid Patients
Source: Research Square preprint supplement (doi:10.21203/rs.3.rs-7017509/v1), 2025-12-11

**Development of the HEMOS (Hemorrhoid Operative Selection) Score: A Clinical Tool to Support Operative Consideration in Hemorrhoid Patients**

Yoon-Hye Kwon, M.D.

Department of Surgery, Uijeongbu Eulji Medical Center, Eulji University College of Medicine, Uijeongbu City, Korea

**Corresponding Author**

Yoon-Hye Kwon, MD, MS., Professor

Division of Colorectal Surgery, Department of Surgery, Eulji University College of Medicine, Uijeongbu Eulji Medical Center, 712 Dongil-ro, Uijeongbu city, Gyeonggi-do, 11759, Korea

Tel: 82‐31‐951‐1719

Fax: 82‐31-951‐1093

E‐mail: yoonhyekwon@eulji.ac.kr

ORCID: 0000-0003-2501-0590

**Supplementary Table 1.** Cut-off analysis of the HEMOS score for predicting surgical intervention (sensitivity, specificity, Youden index)

| **Cut-off** | **Sensitivity (%)** | **Specificity (%)** | **Youden index** |
| --- | --- | --- | --- |
| 8 | 7.5 | 100 | 0.075 |
| 6 | 77.5 | 88.1 | 0.656 |
| 5 | 77.5 | 80.9 | 0.584 |
| **4** | **95** | **74.2** | **0.692** |
| 3 | 97.5 | 51.5 | 0.49 |
| 2 | 97.5 | 43.8 | 0.413 |
| 1 | 100 | 42.8 | 0.428 |
| 0 | 100 | 0 | 0 |

* Youden index=(specificity + sensitivity – 1)

**Supplementary Table 2.** Five-fold cross-validation results for the HEMOS score

| **Fold** | **AUC** | **Accuracy (%)** |
| --- | --- | --- |
| 1 | 0.833 | 76.6 |
| 2 | 0.859 | 80.9 |
| 3 | 0.978 | 76.6 |
| 4 | 0.961 | 78.7 |
| 5 | 0.929 | 87 |
| **Mean** | **0.900** | **81.5** |

**Supplementary Fig.1** Confusion matrix visualization of the HEMOS score at a cut-off of 4.0 for predicting surgical intervention.


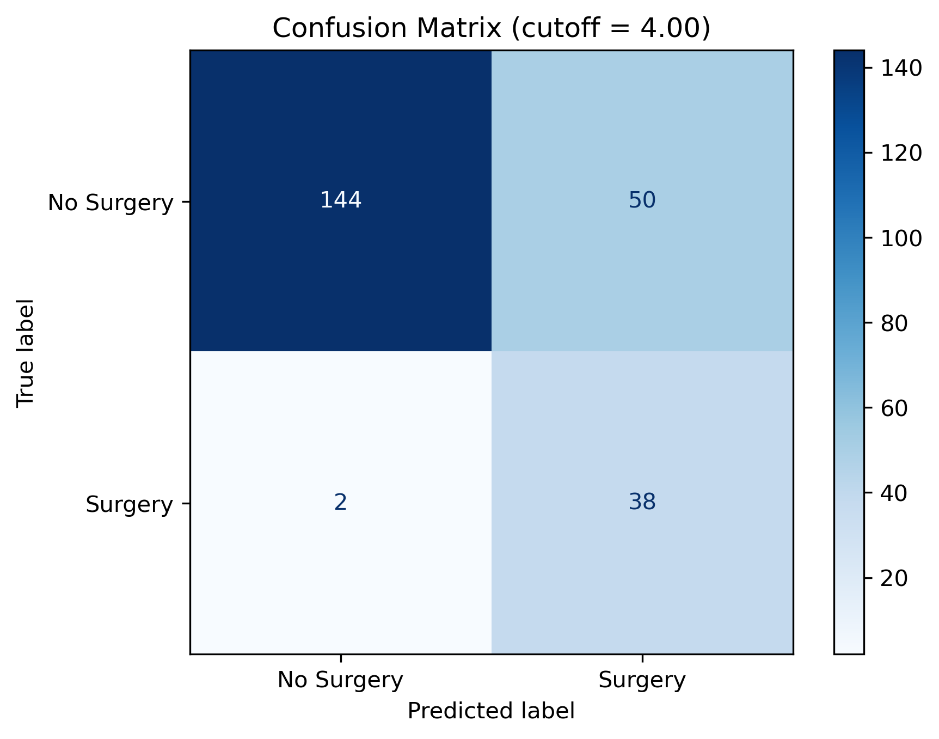

Supplement: Supplementary file 1 [file 5ea27a86db81ae722bc7a09b.docx]
